# Supplementary material
Source: PubMed Central journal article supplement (PMC3464645)
Supplement: mt2012126x2.pdf [file mt2012126x2.pdf]

| <i>Region</i>                  | <i>M3a</i>   | <i>E2C/M3a</i> | <i>N57/E2C+M3a</i> | <i>E2C/M3a+M3a</i> | <i>random control</i> |
|--------------------------------|--------------|----------------|--------------------|--------------------|-----------------------|
| total unique integrations      | 6704 (100%)  | 556 (100%)     | 3646 (100%)        | 4786 (100%)        | 25904 (100%)          |
| genes                          | 2692 (40.1%) | 225 (40.5%)    | 1434 (39.3%)       | 2018 (42.2%)*      | 10584 (40.9%)         |
| exons                          | 106 (1.58%)  | 8 (1.44%)      | 44 (1.21%)         | 73 (1.53%)         | 402 (1.55%)           |
| introns                        | 2594 (38.7%) | 217 (39.0%)    | 1392 (38.2%)       | 1950 (40.7%)*      | 10211 (39.4%)         |
| 2kb window around TSS          | 55 (0.82%)   | 7 (1.26%)      | 28 (0.768%)        | 32 (0.669%)        | 249 (0.961%)          |
| 5kb window around TSS          | 199 (2.97%)  | 19 (3.42%)     | 107 (2.93%)        | 138 (2.88%)        | 751 (2.9%)            |
| 10kb window around TSS         | 443 (6.61%)  | 40 (7.19%)     | 216 (5.92%)        | 330 (6.9%)         | 1537 (5.93%)*         |
| 20kb window around TSS         | 873 (13.0%)  | 82 (14.7%)     | 432 (11.8%)        | 621 (13.0%)        | 2926 (11.3%)*         |
| 2kb window around TES          | 93 (1.39%)   | 6 (1.08%)      | 40 (1.1%)          | 56 (1.17%)         | 324 (1.25%)           |
| 5kb window around TES          | 213 (3.18%)  | 15 (2.7%)      | 101 (2.77%)        | 158 (3.3%)         | 767 (2.96%)           |
| 10kb window around TES         | 428 (6.38%)  | 38 (6.83%)     | 200 (5.49%)        | 312 (6.52%)        | 1472 (5.68%)*         |
| 20kb window around TES         | 782 (11.7%)  | 70 (12.6%)     | 424 (11.6%)        | 584 (12.2%)        | 2771 (10.7%)*         |
| within 2kb upstream of gene    | 94 (1.4%)    | 8 (1.44%)      | 53 (1.45%)         | 53 (1.11%)         | 309 (1.19%)           |
| within 5kb upstream of gene    | 256 (3.82%)  | 19 (3.42%)     | 128 (3.51%)        | 184 (3.84%)        | 833 (3.22%)*          |
| within 10kb upstream of gene   | 530 (7.9%)   | 45 (8.09%)     | 244 (6.69%)*       | 338 (7.06%)        | 1611 (6.22%)*         |
| within 20kb upstream of gene   | 968 (14.4%)  | 72 (12.9%)     | 492 (13.5%)        | 655 (13.7%)        | 3061 (11.8%)*         |
| within 2kb downstream of gene  | 95 (1.42%)   | 7 (1.26%)      | 44 (1.21%)         | 62 (1.3%)          | 342 (1.32%)           |
| within 5kb downstream of gene  | 237 (3.53%)  | 22 (3.96%)     | 107 (2.93%)        | 164 (3.43%)        | 796 (3.07%)           |
| within 10kb downstream of gene | 454 (6.77%)  | 39 (7.01%)     | 256 (7.02%)        | 328 (6.85%)        | 1518 (5.86%)*         |
| within 20kb downstream of gene | 839 (12.5%)  | 74 (13.3%)     | 460 (12.6%)        | 641 (13.4%)        | 2941 (11.4%)*         |
| at most 2kb to CpG islands     | 90 (1.34%)   | 10 (1.8%)      | 37 (1.01%)         | 63 (1.32%)         | 308 (1.19%)           |
| at most 5kb to CpG islands     | 268 (4.0%)   | 20 (3.6%)      | 115 (3.15%)*       | 198 (4.14%)        | 826 (3.19%)*          |
| at most 10kb to CpG islands    | 492 (7.34%)  | 44 (7.91%)     | 248 (6.8%)         | 375 (7.84%)        | 1560 (6.02%)*         |
| at most 20kb to CpG islands    | 872 (13.0%)  | 74 (13.3%)     | 468 (12.8%)        | 641 (13.4%)        | 2813 (10.9%)*         |
| H3K27me3                       | 2871 (42.8%) | 218 (39.2%)    | 1537 (42.2%)       | 2070 (43.3%)       | 11537 (44.5%)*        |
| H3K4me1                        | 565 (8.43%)  | 40 (7.19%)     | 262 (7.19%)*       | 375 (7.84%)        | 1865 (7.2%)*          |
| H3K4me3                        | 159 (2.37%)  | 13 (2.34%)     | 78 (2.14%)         | 104 (2.17%)        | 457 (1.76%)*          |
| GGGGCCGGAGCCGCAGTG.0err.20k    | 0 (0.0%)     | 0 (0.0%)       | 0 (0.0%)           | 0 (0.0%)           | 1 (0.00386%)          |
| GGGGCCGGAGCCGCAGTG.0err.5k     | 0 (0.0%)     | 0 (0.0%)       | 0 (0.0%)           | 0 (0.0%)           | 0 (0.0%)              |
| GGGGCCGGAGCCGCAGTG.1err.20k    | 0 (0.0%)     | 0 (0.0%)       | 0 (0.0%)           | 0 (0.0%)           | 1 (0.00386%)          |
| GGGGCCGGAGCCGCAGTG.1err.5k     | 0 (0.0%)     | 0 (0.0%)       | 0 (0.0%)           | 0 (0.0%)           | 0 (0.0%)              |
| GGGGCCGGAGCCGCAGTG.2err.20k    | 7 (0.104%)   | 0 (0.0%)       | 2 (0.0549%)        | 3 (0.0627%)        | 13 (0.0502%)          |
| GGGGCCGGAGCCGCAGTG.2err.5k     | 1 (0.0149%)  | 0 (0.0%)       | 0 (0.0%)           | 2 (0.0418%)        | 2 (0.00772%)          |
| left.GGGGCCGGA.0err.20k        | 253 (3.77%)  | 25 (4.5%)      | 116 (3.18%)        | 181 (3.78%)        | 716 (2.76%)*          |
| left.GGGGCCGGA.0err.5k         | 55 (0.82%)   | 6 (1.08%)      | 19 (0.521%)        | 38 (0.794%)        | 164 (0.633%)          |
| right.GCCGCAGTG.0err.20k       | 268 (4.0%)   | 16 (2.88%)     | 131 (3.59%)        | 164 (3.43%)        | 876 (3.38%)*          |
| right.GCCGCAGTG.0err.5k        | 68 (1.01%)   | 6 (1.08%)      | 26 (0.713%)        | 32 (0.669%)        | 191 (0.737%)*         |
