# Supplementary material
Source: PubMed Central journal article supplement (PMC3464645)
Supplement: mt2012126x3.pdf [file mt2012126x3.pdf]

| <i>Region</i>                  | <i>SB100X</i>  | <i>ZF B/SB100X</i> | <i>N57/ZF B+SB100X</i> | <i>random control</i> |
|--------------------------------|----------------|--------------------|------------------------|-----------------------|
| total unique integrations      | 11873 (100.0%) | 4782 (100.0%)      | 8193 (100.0%)          | 25904 (100.0%)        |
| genes                          | 5252 (44.2%)   | 1983 (41.5%)**     | 3413 (41.7%)***        | 10584 (40.9%)***      |
| exons                          | 207 (1.74%)    | 89 (1.86%)         | 132 (1.61%)            | 402 (1.55%)           |
| introns                        | 5062 (42.6%)   | 1902 (39.8%)***    | 3296 (40.2%)***        | 10211 (39.4%)***      |
| 2kb window around TSS          | 129 (1.09%)    | 54 (1.13%)         | 79 (0.964%)            | 249 (0.961%)          |
| 5kb window around TSS          | 426 (3.59%)    | 157 (3.28%)        | 258 (3.15%)            | 751 (2.9%)***         |
| 10kb window around TSS         | 975 (8.21%)    | 341 (7.13%)*       | 574 (7.01%)**          | 1537 (5.93%)***       |
| 20kb window around TSS         | 1831 (15.4%)   | 664 (13.9%)*       | 1174 (14.3%)*          | 2926 (11.3%)***       |
| 2kb window around TES          | 184 (1.55%)    | 75 (1.57%)         | 130 (1.59%)            | 324 (1.25%)*          |
| 5kb window around TES          | 447 (3.76%)    | 166 (3.47%)        | 293 (3.58%)            | 767 (2.96%)***        |
| 10kb window around TES         | 875 (7.37%)    | 330 (6.9%)         | 609 (7.43%)            | 1472 (5.68%)***       |
| 20kb window around TES         | 1684 (14.2%)   | 637 (13.3%)        | 1108 (13.5%)           | 2771 (10.7%)***       |
| within 2kb upstream of gene    | 178 (1.5%)     | 71 (1.48%)         | 111 (1.35%)            | 309 (1.19%)*          |
| within 5kb upstream of gene    | 566 (4.77%)    | 193 (4.04%)*       | 325 (3.97%)**          | 833 (3.22%)***        |
| within 10kb upstream of gene   | 1077 (9.07%)   | 366 (7.65%)**      | 691 (8.43%)            | 1611 (6.22%)***       |
| within 20kb upstream of gene   | 1877 (15.8%)   | 700 (14.6%)        | 1267 (15.5%)           | 3061 (11.8%)***       |
| within 2kb downstream of gene  | 191 (1.61%)    | 59 (1.23%)         | 141 (1.72%)            | 342 (1.32%)*          |
| within 5kb downstream of gene  | 495 (4.17%)    | 170 (3.55%)        | 359 (4.38%)            | 796 (3.07%)***        |
| within 10kb downstream of gene | 982 (8.27%)    | 361 (7.55%)        | 653 (7.97%)            | 1518 (5.86%)***       |
| within 20kb downstream of gene | 1780 (15.0%)   | 664 (13.9%)        | 1171 (14.3%)           | 2941 (11.4%)***       |
| at most 2kb to CpG islands     | 211 (1.78%)    | 89 (1.86%)         | 140 (1.71%)            | 308 (1.19%)***        |
| at most 5kb to CpG islands     | 559 (4.71%)    | 217 (4.54%)        | 364 (4.44%)            | 826 (3.19%)***        |
| at most 10kb to CpG islands    | 1084 (9.13%)   | 409 (8.55%)        | 677 (8.26%)*           | 1560 (6.02%)***       |
| at most 20kb to CpG islands    | 1860 (15.7%)   | 728 (15.2%)        | 1209 (14.8%)           | 2813 (10.9%)***       |
| H3K27me3                       | 4771 (40.2%)   | 1938 (40.5%)       | 3297 (40.2%)           | 11537 (44.5%)***      |
| H3K4me1                        | 1013 (8.53%)   | 360 (7.53%)*       | 688 (8.4%)             | 1865 (7.2%)***        |
| H3K4me3                        | 312 (2.63%)    | 109 (2.28%)        | 185 (2.26%)            | 457 (1.76%)***        |
| GCCATAAAAAATGATGAG.0err.20k    | 979 (8.25%)    | 511 (10.7%)***     | 823 (10.0%)***         | 2352 (9.08%)**        |
| GCCATAAAAAATGATGAG.0err.2k     | 158 (1.33%)    | 149 (3.12%)***     | 217 (2.65%)***         | 257 (0.992%)**        |
| GCCATAAAAAATGATGAG.0err.400    | 40 (0.337%)    | 65 (1.36%)***      | 67 (0.818%)***         | 49 (0.189%)**         |
| GCCATAAAAAATGATGAG.0err.5k     | 310 (2.61%)    | 209 (4.37%)***     | 337 (4.11%)***         | 651 (2.51%)           |
| GCCATAAAAAATGATGAG.1err.20k    | 1784 (15.0%)   | 894 (18.7%)***     | 1534 (18.7%)***        | 4329 (16.7%)***       |
| GCCATAAAAAATGATGAG.1err.2k     | 322 (2.71%)    | 270 (5.65%)***     | 422 (5.15%)***         | 488 (1.88%)***        |
| GCCATAAAAAATGATGAG.1err.400    | 89 (0.75%)     | 98 (2.05%)***      | 153 (1.87%)***         | 78 (0.301%)***        |
| GCCATAAAAAATGATGAG.1err.5k     | 632 (5.32%)    | 391 (8.18%)***     | 656 (8.01%)***         | 1227 (4.74%)*         |
| GCCATAAAAAATGATGAG.2err.20k    | 2406 (20.3%)   | 1148 (24.0%)***    | 1997 (24.4%)***        | 5723 (22.1%)***       |
| GCCATAAAAAATGATGAG.2err.2k     | 446 (3.76%)    | 337 (7.05%)***     | 560 (6.84%)***         | 671 (2.59%)***        |
| GCCATAAAAAATGATGAG.2err.400    | 137 (1.15%)    | 120 (2.51%)***     | 216 (2.64%)***         | 121 (0.467%)***       |
| GCCATAAAAAATGATGAG.2err.5k     | 868 (7.31%)    | 495 (10.4%)***     | 884 (10.8%)***         | 1703 (6.57%)**        |
| GCCNTANAANATGATGAG.0err.20k    | 1008 (8.49%)   | 529 (11.1%)***     | 840 (10.3%)***         | 2428 (9.37%)**        |
| GCCNTANAANATGATGAG.0err.2k     | 167 (1.41%)    | 153 (3.2%)***      | 223 (2.72%)***         | 268 (1.03%)**         |
| GCCNTANAANATGATGAG.0err.400    | 37 (0.312%)    | 65 (1.36%)***      | 68 (0.83%)***          | 49 (0.189%)*          |
| GCCNTANAANATGATGAG.0err.5k     | 322 (2.71%)    | 216 (4.52%)***     | 346 (4.22%)***         | 673 (2.6%)            |
| GCCNTANAANATGATGAG.1err.20k    | 1864 (15.7%)   | 917 (19.2%)***     | 1590 (19.4%)***        | 4498 (17.4%)***       |
| GCCNTANAANATGATGAG.1err.2k     | 346 (2.91%)    | 276 (5.77%)***     | 437 (5.33%)***         | 507 (1.96%)***        |
| GCCNTANAANATGATGAG.1err.400    | 99 (0.834%)    | 97 (2.03%)***      | 160 (1.95%)***         | 78 (0.301%)***        |
| GCCNTANAANATGATGAG.1err.5k     | 670 (5.64%)    | 397 (8.3%)***      | 683 (8.34%)***         | 1289 (4.98%)**        |
| left.GCCATAAAA.0err.20k        | 5455 (45.9%)   | 2341 (49.0%)***    | 3966 (48.4%)***        | 12659 (48.9%)***      |
| left.GCCATAAAA.0err.2k         | 964 (8.12%)    | 551 (11.5%)***     | 882 (10.8%)***         | 1795 (6.93%)***       |
| left.GCCATAAAA.0err.400        | 253 (2.13%)    | 173 (3.62%)***     | 307 (3.75%)***         | 385 (1.49%)***        |
| left.GCCATAAAA.0err.5k         | 1973 (16.6%)   | 917 (19.2%)***     | 1551 (18.9%)***        | 4323 (16.7%)          |
| right.AATGATGAG.0err.20k       | 4007 (33.7%)   | 1734 (36.3%)**     | 2920 (35.6%)**         | 9539 (36.8%)***       |
| right.AATGATGAG.0err.2k        | 612 (5.15%)    | 363 (7.59%)***     | 547 (6.68%)***         | 1225 (4.73%)          |
| right.AATGATGAG.0err.400       | 146 (1.23%)    | 131 (2.74%)***     | 178 (2.17%)***         | 227 (0.876%)**        |
| right.AATGATGAG.0err.5k        | 1271 (10.7%)   | 643 (13.4%)***     | 1053 (12.9%)***        | 2916 (11.3%)          |
