# Supplementary material
Source: PubMed Central journal article supplement (PMC3464645)
Supplement: mt2012126x4.pdf [file mt2012126x4.pdf]

| <i>Region</i>                 | <i>SB100X</i>   | <i>ZF B/SB100X</i> | <i>N57/ZF B+SB100X</i> | <i>random control</i> |
|-------------------------------|-----------------|--------------------|------------------------|-----------------------|
| total integrations            | 14372 (100.0%)  | 6475 (100.0%)      | 11750 (100.0%)         | 29765 (100.0%)        |
| all repeats                   | 8404.19 (58.5%) | 4243.92 (65.5%)*** | 7954.1 (67.7%)***      | 16224.89 (54.5%)***   |
| DNA                           | 459.09 (3.19%)  | 159.89 (2.47%)**   | 291.17 (2.48%)***      | 1021.88 (3.43%)       |
| DNA_DNA                       | 2.0 (0.0139%)   | 0.0 (0.0%)         | 2.0 (0.017%)           | 4.0 (0.0134%)         |
| DNA_hAT-Blackjack             | 14.0 (0.0974%)  | 6.0 (0.0927%)      | 16.0 (0.136%)          | 33.0 (0.111%)         |
| DNA_hAT-Charlie               | 208.07 (1.45%)  | 62.0 (0.958%)**    | 119.46 (1.02%)**       | 454.92 (1.53%)        |
| DNA_hAT-Tip100                | 20.0 (0.139%)   | 10.0 (0.154%)      | 16.0 (0.136%)          | 60.04 (0.202%)        |
| DNA_hAT                       | 7.0 (0.0487%)   | 2.0 (0.0309%)      | 9.0 (0.0766%)          | 14.0 (0.047%)         |
| DNA_Merlin                    | 0.0 (0.0%)      | 0.0 (0.0%)         | 0.0 (0.0%)             | 0.0 (0.0%)            |
| DNA_MuDR                      | 5.04 (0.0351%)  | 0.0 (0.0%)         | 4.0 (0.034%)           | 5.01 (0.0168%)        |
| DNA_PiggyBac                  | 1.0 (0.00696%)  | 0.0 (0.0%)         | 0.0 (0.0%)             | 4.03 (0.0135%)        |
| DNA_TcMar-Mariner             | 6.0 (0.0417%)   | 0.0 (0.0%)         | 5.17 (0.044%)          | 29.04 (0.0976%)       |
| DNA_TcMar-Tc2                 | 10.0 (0.0696%)  | 2.33 (0.036%)      | 5.0 (0.0426%)          | 18.25 (0.0613%)       |
| DNA_TcMar-Tigger              | 185.98 (1.29%)  | 77.56 (1.2%)       | 112.55 (0.958%)*       | 395.58 (1.33%)        |
| DNA_TcMar                     | 0.0 (0.0%)      | 0.0 (0.0%)         | 2.0 (0.017%)           | 4.0 (0.0134%)         |
| LINE                          | 5258.91 (36.6%) | 2824.43 (43.6%)*** | 5588.72 (47.6%)***     | 8606.71 (28.9%)***    |
| LINE_CR1                      | 39.33 (0.274%)  | 20.0 (0.309%)      | 23.0 (0.196%)          | 102.23 (0.343%)       |
| LINE_Dong-R4                  | 0.0 (0.0%)      | 0.0 (0.0%)         | 1.0 (0.00851%)         | 2.0 (0.00672%)        |
| LINE_L1                       | 4683.68 (32.6%) | 2616.43 (40.4%)*** | 5259.12 (44.8%)***     | 7554.67 (25.4%)***    |
| LINE_L2                       | 511.9 (3.56%)   | 177.0 (2.73%)**    | 289.1 (2.46%)***       | 908.73 (3.05%)**      |
| LINE_RTE-BovB                 | 0.0 (0.0%)      | 0.0 (0.0%)         | 0.0 (0.0%)             | 1.0 (0.00336%)        |
| LINE_RTE                      | 24.0 (0.167%)   | 11.0 (0.17%)       | 16.5 (0.14%)           | 38.08 (0.128%)        |
| LTR                           | 913.85 (6.36%)  | 460.98 (7.12%)*    | 627.8 (5.34%)***       | 2056.05 (6.91%)*      |
| LTR_ERV1                      | 321.62 (2.24%)  | 158.57 (2.45%)     | 240.44 (2.05%)         | 692.02 (2.32%)        |
| LTR_ERVK                      | 49.52 (0.345%)  | 15.0 (0.232%)      | 32.0 (0.272%)          | 76.68 (0.258%)        |
| LTR_ERVL-MaLR                 | 333.09 (2.32%)  | 206.39 (3.19%)***  | 205.04 (1.75%)**       | 805.92 (2.71%)*       |
| LTR_ERVL                      | 205.62 (1.43%)  | 77.02 (1.19%)      | 143.31 (1.22%)         | 445.43 (1.5%)         |
| LTR_ERV                       | 1.0 (0.00697%)  | 0.0 (0.0%)         | 1.0 (0.00851%)         | 3.0 (0.0101%)         |
| LTR_Gypsy                     | 3.0 (0.0209%)   | 1.0 (0.0154%)      | 3.0 (0.0255%)          | 25.0 (0.084%)*        |
| LTR_LTR                       | 0.0 (0.0%)      | 3.0 (0.0463%)*     | 3.0 (0.0255%)          | 8.0 (0.0269%)         |
| SINE                          | 1063.75 (7.4%)  | 539.1 (8.33%)*     | 796.87 (6.78%)         | 3581.74 (12.0%)***    |
| SINE_Alu                      | 557.4 (3.88%)   | 373.84 (5.77%)***  | 496.0 (4.22%)          | 2669.18 (8.97%)***    |
| SINE_Deu                      | 0.0 (0.0%)      | 0.0 (0.0%)         | 0.0 (0.0%)             | 3.0 (0.0101%)         |
| SINE_MIR                      | 503.34 (3.5%)   | 164.27 (2.54%)***  | 299.86 (2.55%)***      | 907.56 (3.05%)*       |
| SINE_SINE                     | 1.0 (0.00696%)  | 1.0 (0.0154%)      | 0.0 (0.0%)             | 0.0 (0.0%)            |
| SINE_tRNA                     | 2.0 (0.0139%)   | 0.0 (0.0%)         | 1.0 (0.00851%)         | 2.0 (0.00672%)        |
| RNA_RNA                       | 0.0 (0.0%)      | 0.0 (0.0%)         | 0.0 (0.0%)             | 1.0 (0.00336%)        |
| scRNA_scRNA                   | 0.0 (0.0%)      | 0.0 (0.0%)         | 0.0 (0.0%)             | 1.0 (0.00336%)        |
| snRNA_snRNA                   | 3.08 (0.0215%)  | 1.0 (0.0154%)      | 1.0 (0.00851%)         | 3.02 (0.0102%)        |
| srpRNA_srpRNA                 | 1.0 (0.00696%)  | 2.0 (0.0309%)      | 1.0 (0.00851%)         | 2.0 (0.00672%)        |
| rRNA_rRNA                     | 2.0 (0.0139%)   | 1.0 (0.0154%)      | 0.0 (0.0%)             | 3.0 (0.0101%)         |
| tRNA_tRNA                     | 0.0 (0.0%)      | 0.0 (0.0%)         | 0.0 (0.0%)             | 0.0 (0.0%)            |
| RC_Helitron                   | 0.0 (7.91e-06%) | 0.0 (0.0%)         | 1.0 (0.00851%)         | 1.0 (0.00336%)        |
| Satellite_acro                | 0.0 (0.0%)      | 0.0 (0.0%)         | 0.0 (0.0%)             | 0.0 (0.0%)            |
| Satellite_cent                | 33.2 (0.231%)   | 25.0 (0.386%)      | 34.0 (0.289%)          | 70.5 (0.237%)         |
| Satellite_Satellite           | 13.0 (0.0905%)  | 7.0 (0.108%)       | 11.0 (0.0936%)         | 33.0 (0.111%)         |
| Satellite_telo                | 0.0 (0.0%)      | 0.0 (0.0%)         | 0.0 (0.0%)             | 0.0 (0.0%)            |
| Simple_repeat_Simple_repeat   | 553.0 (3.85%)   | 203.19 (3.14%)*    | 534.84 (4.55%)**       | 495.4 (1.66%)***      |
| Low_complexity_Low_complexity | 79.06 (0.55%)   | 19.33 (0.299%)*    | 57.68 (0.491%)         | 284.64 (0.956%)***    |
| Other_Other                   | 18.48 (0.129%)  | 1.0 (0.0154%)*     | 9.01 (0.0767%)*        | 46.45 (0.156%)        |
| Unknown_Unknown               | 8.0 (0.0557%)   | 0.0 (0.0%)         | 1.0 (0.00851%)*        | 20.0 (0.0672%)        |
